# Supplementary material for: Potency-related effects of smoked cannabis on simulated driving performance: a randomized, controlled crossover trial
Source: Sci Rep. 2026 Mar 10;16:12961. doi: 10.1038/s41598-026-43045-2 (PMC13096524; doi:10.1038/s41598-026-43045-2)
Supplement: Supplementary file 2 — Supplementary Material 2 [file 41598_2026_43045_MOESM2_ESM.xlsx]

## Sheet: Descriptives Blood Data - Compl
tx	Time	thc_mean	thc_sd	thc_median	thc_min	thc_max	thc_n	thc_cooh_mean	thc_cooh_sd	thc_cooh_median	thc_cooh_min	thc_cooh_max	thc_cooh_n	thc_11oh_mean	thc_11oh_sd	thc_11oh_median	thc_11oh_min	thc_11oh_max	thc_11oh_n
Pla	0	0.229736	0.515986	0	0	1.91	33	4.75572	15.1798	0.58	0	85.66	33	0.132424	0.198085	0	0	0.7	33
Pla	5	0.203465	0.47525	0	0	1.62	33	2.42072	4.50901	0.5	0	19.17	33	0.131515	0.20948	0	0	0.91	33
Pla	15	0.234294	0.535023	0	0	1.83	33	2.63095	5.20776	0.5	0	23.77	33	0.128788	0.191144	0	0	0.7	33
Pla	30	0.17697	0.42762	0	0	1.31	33	2.2879	4.16436	0.5	0	16.6	33	0.116061	0.184169	0	0	0.66	33
Pla	60	0.196956	0.486505	0	0	1.84	33	2.52915	4.65439	0.63	0	18.55	33	0.120303	0.189728	0	0	0.71	33
Pla	90	0.200207	0.518388	0	0	2.19	33	2.33416	4.6227	0.49	0	21.54	33	0.128788	0.189188	0	0	0.66	33
Pla	120	0.186061	0.515321	0	0	2.12	33	2.28273	4.26732	0.43	0	19.63	33	0.123636	0.20143	0	0	0.68	33
Pla	180	0.204545	0.492278	0	0	1.98	33	2.26325	4.60972	0.48	0	21.14	33	0.125455	0.18233	0	0	0.64	33
Pla	240	0.230925	0.5598	0	0	2.48	33	2.0784	3.85537	0.46	0	18.11	33	0.131515	0.192421	0	0	0.63	33
Pla	300	0.288944	0.600177	0	0	2.38	33	1.91085	3.69732	0.41	0	15.24	33	0.138485	0.186951	0	0	0.56	33
Pla	360	0.257273	0.635523	0	0	2.33	33	1.77111	3.35771	0.39	0	14.82	33	0.119697	0.182474	0	0	0.55	33
Low	0	0.137714	0.305278	0	0	1.23	35	2.78892	5.04632	0.64	0	21.4	35	0.129143	0.201456	0	0	0.7	35
Low	5	16.0554	15.3025	12.09	0	63.9	34	10.0958	12.1814	5.465	0	60.41	34	1.48497	1.53681	1.11	0	5.91	34
Low	15	6.44604	5.92506	5.21	0	23.54	34	11.6489	13.6215	6.755	0	71.22	34	1.30366	1.35574	1.015	0	5.66	34
Low	30	4.81499	4.62802	3.83	0	17.35	35	9.75609	10.7022	5.18	0.67	53.92	35	1.15358	1.25658	0.84	0	5.4	35
Low	60	2.88925	2.65959	2.27	0	9.82	35	7.86687	8.08063	4.9904	0	35.39	35	0.916178	0.917901	0.75	0	3.95	35
Low	90	2.33992	2.20053	1.7	0	7.45	34	7.17006	7.3083	4.37765	0	31.15	34	0.646758	0.799314	0.5	0	3.32	34
Low	120	1.543	1.61382	1.075	0	4.95	34	6.27317	6.35545	3.61436	0	25.51	34	0.475	0.613442	0.33	0	2.18	34
Low	180	0.861647	1.25611	0.36	0	4.33	34	5.72158	6.27665	2.885	0	26.29	34	0.387353	0.490493	0.315	0	1.66	34
Low	240	0.614673	0.995126	0	0	3.85	33	4.98838	5.46603	2.87	0	22.75	33	0.281212	0.352099	0.25	0	1.19	33
Low	300	0.461982	0.832847	0	0	2.83	33	4.49595	4.88395	2.65	0	18.97	33	0.244848	0.320743	0	0	1.05	33
Low	360	0.371844	0.700046	0	0	2.7	32	3.67492	3.79646	2.105	0	12.33	32	0.1825	0.289036	0	0	0.98	32
Med	0	0.16125	0.414564	0	0	1.45	32	2.82636	4.83005	0.98	0	23	32	0.122813	0.199535	0	0	0.82	32
Med	5	19.7143	24.5238	13.7423	0	124.86	32	12.9953	12.833	8.975	0	53.71	32	2.32259	2.70847	1.42042	0	11.94	32
Med	15	8.11292	8.91098	4.69371	0	39.66	32	14.7774	14.347	10.28	0	56.55	32	2.05487	2.51867	1.30404	0	11.55	32
Med	30	5.65236	5.81982	2.98	0	22.02	31	11.5104	10.9172	7.58	0	36.03	31	1.57189	1.94694	0.87	0	9.45	31
Med	60	3.80793	3.97332	2.07	0	13.96	32	10.0543	9.16613	7.475	0	34.52	32	1.37869	1.62887	0.79	0	7.45	32
Med	90	2.59491	2.54689	1.55	0	9.72	31	9.1105	8.86936	5.72	0	37.06	31	1.07325	1.2392	0.69	0	5.39	31
Med	120	1.59975	1.81258	1.055	0	6.27	32	8.45197	8.78017	5.275	0	34.2611	32	0.71102	0.921925	0.44	0	4.06	32
Med	180	0.938885	1.16378	0.36	0	3.85	31	7.0785	7.1786	4.83	0	32.14	31	0.51	0.661881	0.41	0	2.4	31
Med	240	0.558003	0.979445	0	0	3.29	30	6.20179	6.48088	4.39	0	27.79	30	0.374667	0.520668	0.25	0	1.87	30
Med	300	0.462576	0.827768	0	0	2.67	30	5.65263	6.32355	3.59	0	23.97	30	0.314333	0.424668	0.15	0	1.52	30
Med	360	0.381856	0.749207	0	0	2.75	30	5.30848	6.1674	3.23	0	23.45	30	0.291333	0.410111	0	0	1.35	30
High	0	0.222641	0.511317	0	0	1.97	34	2.57268	4.30481	0.99	0	17.95	34	0.123529	0.185666	0	0	0.63	34
High	5	30.3221	35.1299	24.308	0	183.81	34	17.051	17.1981	8.51	1.09	59.697	34	2.70608	2.51113	1.715	0	8.05	34
High	15	14.8862	13.8058	11.55	0.54	46.43	33	19.4198	18.6444	12.66	1.79	76.1	33	2.73594	2.71634	1.77606	0	13.51	33
High	30	9.0526	7.66622	7	0	31.93	32	16.5215	15.8475	10.445	1.19	65.16	32	2.2788	2.55395	1.42527	0	12.31	32
High	60	6.06514	5.35636	4.71	0	22.35	31	13.6106	12.6202	9.64	0.91	50.32	31	1.75631	1.88847	1.46	0	8.68	31
High	90	4.00155	3.75461	3.33	0	16.05	32	11.1924	10.7372	7.08603	1.19	46.16	32	1.38783	1.56241	1.11107	0	7.38	32
High	120	2.57891	2.55016	1.95452	0	10.08	31	10.1838	9.97892	7.56	0.84	42.76	31	1.00564	1.09343	0.71	0	4.67	31
High	180	1.15843	1.34271	0.73	0	4.59	31	8.57548	8.05295	5.13	0.57	32.86	31	0.626792	0.720722	0.4	0	2.94	31
High	240	0.721538	0.888151	0.36	0	3.08	31	7.10552	6.74131	4.1	0.43	27.94	31	0.440179	0.505157	0.33	0	1.76	31
High	300	0.518617	0.75208	0	0	2.28	31	6.1607	6.08619	3.51	0.38	26.07	31	0.351613	0.415909	0.32	0	1.45	31
High	360	0.347333	0.714442	0	0	2.29	30	5.10803	5.62963	2.80102	0	24.6	30	0.335	0.386289	0.195	0	1.15	30
