# Supplementary material for: Potency-related effects of smoked cannabis on simulated driving performance: a randomized, controlled crossover trial
Source: Sci Rep. 2026 Mar 10;16:12961. doi: 10.1038/s41598-026-43045-2 (PMC13096524; doi:10.1038/s41598-026-43045-2)
Supplement: Supplementary file 3 — Supplementary Material 3 [file 41598_2026_43045_MOESM3_ESM.xlsx]

## Sheet: Descriptives Driving Variables 
tx	tm	atent	sdlp_mean	sdlp_sd	sdlp_median	sdlp_min	sdlp_max	sdlp_n	msp_mean	msp_sd	msp_median	msp_min	msp_max	msp_n	sdsp_mean	sdsp_sd	sdsp_median	sdsp_min	sdsp_max	sdsp_n	mxsp_mean	mxsp_sd	mxsp_median	mxsp_min	mxsp_max	mxsp_n
High	0 min	div	0.264979	0.0453223	0.255827	0.191641	0.382921	34	84.4266	5.5945	82.3345	76.1748	98.9215	34	3.51051	1.43824	3.32151	1.52502	8.07338	34	94.637	8.1825	92.814	83.174	111.261	34
High	0 min	full	0.285208	0.0579582	0.279556	0.168375	0.438877	34	84.2184	5.35074	82.0467	77.4605	98.7075	34	2.92753	1.87329	2.39849	0.692162	11.4251	34	92.4281	8.25519	90.2645	82.3603	123.992	34
High	30 min	div	0.318302	0.0876491	0.314928	0.213429	0.6112	33	85.7519	8.35453	82.1852	73.5579	110.509	33	5.07282	3.57357	3.8843	1.8014	17.8682	33	98.4579	13.0348	93.0128	84.3119	134.768	33
High	30 min	full	0.340965	0.0840139	0.324787	0.213479	0.60401	33	84.8814	8.52174	82.1706	65.6708	109.936	33	4.60287	5.52679	2.7875	1.05541	29.1229	33	95.2558	14.139	91.0687	81.2795	151.876	33
High	90 min	div	0.309906	0.0832027	0.305184	0.196884	0.631649	32	85.0903	7.48096	81.906	75.3733	106.282	32	4.34333	2.04487	4.23053	1.69748	10.7673	32	97.1541	11.9844	92.9948	82.8498	128.179	32
High	90 min	full	0.33279	0.0815786	0.324234	0.206193	0.540405	32	85.4854	9.02509	81.9171	77.0277	121.282	32	4.11819	4.04161	3.38723	1.15753	24.6075	32	95.5886	13.5767	91.1391	82.1528	151.921	32
Low	0 min	div	0.264057	0.0475611	0.258595	0.174828	0.390111	35	83.8886	4.91101	82.4572	76.3682	95.5724	35	3.76216	1.59682	3.57682	1.2754	7.11074	35	94.3256	7.60577	94.4516	83.8385	116.393	35
Low	0 min	full	0.280838	0.0474364	0.28518	0.173576	0.393745	35	83.4748	3.72707	82.3359	77.4354	94.1936	35	2.73167	1.18592	2.50542	0.909787	6.07198	35	91.7686	5.34166	89.7795	83.0513	102.021	35
Low	30 min	div	0.299176	0.060301	0.285572	0.201448	0.46039	35	84.3467	4.72112	82.9601	77.4061	98.1028	35	4.13074	1.45458	4.41104	1.38136	6.58519	35	96.576	8.67896	95.6444	84.4588	117.411	35
Low	30 min	full	0.322516	0.0872341	0.313568	0.213315	0.684679	35	83.8596	4.2478	82.5512	79.2764	99.3354	35	3.15911	1.20897	3.37942	1.11557	5.55513	35	93.7483	7.13426	92.091	84.3409	110.943	35
Low	90 min	div	0.310381	0.0709536	0.302323	0.200052	0.569346	34	83.8443	4.46943	83.0757	77.2844	98.5195	34	4.30106	2.00996	4.04746	1.74634	10.5348	34	95.6624	8.77409	92.8514	84.1638	121.025	34
Low	90 min	full	0.316623	0.0672581	0.318134	0.207108	0.506965	34	84.3	4.91059	82.4856	77.8374	99.5639	34	3.46845	1.67316	3.27895	1.02302	8.46544	34	93.7933	7.51085	93.5603	83.1598	110.943	34
Med	0 min	div	0.269297	0.0484835	0.258173	0.181987	0.393727	32	84.0551	4.96564	82.9052	76.7973	103.055	32	3.72765	1.52596	3.56984	1.7747	8.29562	32	95.853	8.90533	94.0465	84.5379	124.058	32
Med	0 min	full	0.284152	0.055294	0.275215	0.179024	0.430851	32	84.0114	5.04909	82.2442	79.1035	103.362	32	2.72223	1.4826	2.30199	1.25232	8.70612	32	91.6443	6.56036	89.08	83.8524	110.593	32
Med	30 min	div	0.302634	0.0711305	0.286952	0.217335	0.525332	32	84.1907	6.76997	83.131	64.5218	104.514	32	5.06737	4.812	3.60167	1.55964	27.0285	32	96.6251	10.8742	93.8824	83.6474	131.167	32
Med	30 min	full	0.319016	0.0640903	0.310335	0.232555	0.508474	32	84.3088	4.98636	82.6825	78.9342	100.853	32	3.42387	2.18538	3.09657	1.10403	11.1819	32	94.9262	10.4261	92.6963	83.3392	127.186	32
Med	90 min	div	0.33588	0.177224	0.284447	0.221368	1.23529	32	85.3879	7.63385	83.9561	74.9339	114.241	32	4.40115	2.49653	3.94692	1.47393	12.2428	32	98.0304	12.6219	98.0162	81.2882	144.24	32
Med	90 min	full	0.324135	0.0864408	0.304084	0.222859	0.651272	32	84.7824	6.75018	82.4399	78.325	108.75	32	3.39228	2.15227	2.96859	1.22511	13.1168	32	94.9607	12.451	91.7998	84.7908	146.852	32
Pla	0 min	div	0.268659	0.0479984	0.275881	0.192738	0.424104	34	83.6999	4.35465	82.5061	77.3856	98.91	34	3.78551	1.85214	3.27215	1.44066	10.1351	34	93.7523	6.79209	92.7843	83.0069	115.486	34
Pla	0 min	full	0.288174	0.0504048	0.280651	0.207931	0.399269	34	83.8822	4.11761	83.0393	79.3947	99.123	34	2.8176	1.04517	2.83954	1.02966	5.5689	34	92.1806	6.02056	90.9604	83.8116	107.469	34
Pla	30 min	div	0.280302	0.0460308	0.271978	0.209081	0.396184	34	83.7883	4.90695	82.92	76.288	102.113	34	3.74123	1.33744	3.67121	1.59706	7.26371	34	94.537	7.54826	92.337	84.14	119.256	34
Pla	30 min	full	0.292074	0.0581999	0.289146	0.195728	0.476007	34	83.9123	4.31829	83.048	78.6768	100.576	34	2.99949	1.15757	3.00248	1.14199	5.65073	34	93.1012	6.77249	91.4828	83.8503	111.857	34
Pla	90 min	div	0.297441	0.0817518	0.282265	0.194968	0.66605	33	84.1724	6.2876	82.4501	77.5071	106.762	33	3.63363	1.25902	3.62761	1.39582	6.11093	33	94.8066	8.86706	94.6065	85.4717	129.972	33
Pla	90 min	full	0.297889	0.0482037	0.295279	0.199701	0.428527	33	84.1972	4.9174	82.647	79.5073	101.732	33	2.9551	0.993615	3.0565	1.07995	5.1046	33	92.6279	6.23726	90.9087	83.7559	110.134	33
