# Supplementary material for: Potency-related effects of smoked cannabis on simulated driving performance: a randomized, controlled crossover trial
Source: Sci Rep. 2026 Mar 10;16:12961. doi: 10.1038/s41598-026-43045-2 (PMC13096524; doi:10.1038/s41598-026-43045-2)
Supplement: Supplementary file 4 — Supplementary Material 4 [file 41598_2026_43045_MOESM4_ESM.xlsx]

## Sheet: Descriptives Driving Variables 
tx	tm	meanRT_mean	meanRT_sd	meanRT_median	meanRT_min	meanRT_max	meanRT_n
High	0 min	0.857366	0.110166	0.848857	0.667714	1.20971	34
High	30 min	0.909583	0.118699	0.8865	0.722143	1.22371	32
High	90 min	0.907917	0.103302	0.878357	0.673714	1.14229	32
Low	0 min	0.861205	0.103814	0.847429	0.642286	1.13725	35
Low	30 min	0.881458	0.0847991	0.855833	0.679286	1.08114	35
Low	90 min	0.886604	0.0961	0.875429	0.698	1.085	35
Med	0 min	0.866811	0.0998686	0.851429	0.681571	1.08171	32
Med	30 min	0.920439	0.126101	0.904786	0.778286	1.24914	32
Med	90 min	0.918357	0.135217	0.912714	0.682143	1.37	32
Pla	0 min	0.868902	0.0828044	0.857554	0.704	1.11357	34
Pla	30 min	0.883228	0.120413	0.861429	0.690286	1.18686	34
Pla	90 min	0.87668	0.105388	0.872429	0.6704	1.13586	34
