# Supplementary material for: Potency-related effects of smoked cannabis on simulated driving performance: a randomized, controlled crossover trial
Source: Sci Rep. 2026 Mar 10;16:12961. doi: 10.1038/s41598-026-43045-2 (PMC13096524; doi:10.1038/s41598-026-43045-2)
Supplement: Supplementary file 5 — Supplementary Material 5 [file 41598_2026_43045_MOESM5_ESM.xlsx]

## Sheet: Descriptives Driving Skills - C
tx	Time	Skill_mean	Skill_sd	Skill_median	Skill_min	Skill_max	Skill_n	Willing_mean	Willing_sd	Willing_median	Willing_min	Willing_max	Willing_n	After_mean	After_sd	After_median	After_min	After_max	After_n
Pla	0	4.29412	0.718981	4	3	5	34	4.70588	0.675521	5	2	5	34	NA	NA	NA	Inf	#NAME?	0
Pla	30	3.85294	0.925476	4	2	5	34	4.02941	1.14111	4	2	5	34	2.97059	0.758199	3	1	5	34
Pla	90	3.94118	0.98292	4	2	5	34	4.23529	1.10258	5	1	5	34	3.05882	0.776206	3	2	5	34
Low	0	4.11429	0.631125	4	3	5	35	4.54286	0.70054	5	3	5	35	NA	NA	NA	Inf	#NAME?	0
Low	30	3.34286	0.937546	3	1	5	35	2.48571	1.19734	2	1	5	35	2.25714	0.950011	2	1	5	35
Low	90	3.4	0.913944	3	1	5	35	2.4	1.21752	2	1	5	35	2.45714	1.12047	2	1	5	35
Med	0	4.15625	0.677251	4	3	5	32	4.71875	0.728869	5	2	5	32	NA	NA	NA	Inf	#NAME?	0
Med	30	3.3125	0.895779	3	1	5	32	2.40625	1.36451	2	1	5	32	2.21875	1.09939	2	1	4	32
Med	90	3.34375	0.937029	3	1	5	32	2.40625	1.29164	2	1	5	32	2.09375	0.892961	2	1	4	32
High	0	4.17647	0.796606	4	2	5	34	4.61765	0.853325	5	1	5	34	NA	NA	NA	Inf	#NAME?	0
High	30	2.90625	1.08834	3	1	5	32	2.03125	1.33161	1.5	1	5	32	1.96875	1.12119	2	1	5	32
High	90	2.65625	1.28539	3	1	5	32	2.15625	1.24717	2	1	5	32	1.875	0.941858	2	1	4	32
